# Supplementary material for: Structures of Native Doublet Microtubules from Trichomonas vaginalis Reveal Parasite-Specific Proteins as Potential Drug Targets
Source: PubMed Central journal article supplement (PMC11398567; doi:10.21203/rs.3.rs-4632384/v1), 2024-09-02
Supplement: NIHMSrs4632384v1-supplement-1.pdf [file NIHMSrs4632384v1-supplement-1.pdf]

### Supplementary Table 1 Cryo-EM data collection

|                                                     | WT Tv-DMT<br>16 nm repeat<br>(EMD-XXXXX)<br>(PDB XXXX) | WT Tv-DMT 48<br>nm repeat<br>(EMD- XXXXX)<br>(PDB XXXX) | WT Tv-DMT 96<br>nm repeat<br>(EMD- XXXXX)<br>(PDB XXXX) |
|-----------------------------------------------------|--------------------------------------------------------|---------------------------------------------------------|---------------------------------------------------------|
| <b>Data collection and processing</b>               |                                                        |                                                         |                                                         |
| Magnification                                       | 81,000                                                 | 81,000                                                  | 81,000                                                  |
| Voltage (kV)                                        | 300                                                    | 300                                                     | 300                                                     |
| Electron exposure (e <sup>-</sup> /Å <sup>2</sup> ) | 45                                                     | 45                                                      | 45                                                      |
| Defocus range (µm)                                  | -1.5 to -2.5                                           | -1.5 to -2.5                                            | -1.5 to -2.5                                            |
| Pixel size (Å)                                      | 1.1                                                    | 1.1                                                     | 1.1                                                     |
| Symmetry imposed                                    | C1                                                     | C1                                                      | C1                                                      |
| particle images (no.)                               | 425,317                                                | 148,707                                                 | 76,082                                                  |
| Map resolution (Å)                                  | 3.8                                                    | 4.2                                                     | 4.4                                                     |
| FSC threshold                                       | 0.143                                                  | 0.143                                                   | 0.143                                                   |
| Repeat unit (nm)                                    | 16                                                     | 48                                                      | 96                                                      |
| Symmetry imposed                                    | C1                                                     | C1                                                      | C1                                                      |

531

532

### Supplementary Table 2 MIPS and MOPS

|   | Location | Protein   | Uniprot ID | Copy number in 96 nm repeat | Length (residues) | Modeled residues | C. reinhardtii orthomolog | T.thermophila ortholog | Human ortholog |
|---|----------|-----------|------------|-----------------------------|-------------------|------------------|---------------------------|------------------------|----------------|
| 1 | Tubulin  | α tubulin | A2E8B1     | 276                         | 452               | 1-439            | α tubulin                 | α tubulin              | α tubulin      |
| 2 | Tubulin  | β tubulin | A2DC16     | 276                         | 447               | 1-428            | β tubulin                 | β tubulin              | β tubulin      |
| 3 | A-tubule | Rib72     | A2GCC1     | 12                          | 595               | 65-595           | Rib72                     | Rib72                  | EFHC1/2        |
| 4 | B-tubule | FAP45     | A2ETR1     | 2                           | 465               | 1-107, 108-465   | FAP45                     | CFAP45                 | FAP45          |
| 5 | B-tubule | FAP52     | A2FVE3     | 6                           | 605               | 1-67, 86-776     | FAP52                     | CFAP52                 | FAP52          |

|    |                       |          |        |    |     |                                  |        |         |        |
|----|-----------------------|----------|--------|----|-----|----------------------------------|--------|---------|--------|
| 6  | Inner Junction        | PACRGB   | A2EJQ5 | 6  | 241 | 18-235                           | PACRG  | PACRG   | PACRG  |
| 7  | A-tubule              | FAP21    | A2F5C9 | 2  | 386 | 321-386                          | FAP21  | FAP21   | FAP21  |
| 8  | Inner Junction        | PACRGA   | A2DAX1 | 6  | 236 | 42-233                           | PACRG  | PACRG   | PACRG  |
| 9  | A-tubule              | FAP53    | A2G223 | 2  | 482 | 1-224, 238-470                   | FAP53  | CFAP53  | FAP53  |
| 10 | A-tubule              | TvFAP12  | A2F1C6 | 2  | 108 | 1-108                            | -      | -       | -      |
| 11 | B-tubule              | CCDC173  | A2EFC9 | 2  | 455 | 33-355, 374-455                  | FAP210 | CCDC173 | FAP210 |
| 12 | A-tubule              | FAP115   | A2F0U9 | 3  | 927 | 1-200, 227-350, 460-628, 713-927 | FAP115 | CFAP115 | -      |
| 13 | A-tubule              | FAP67    | A2E829 | 2  | 375 | 1-375                            | FAP67  | CFAP67A | NME7   |
| 14 | B-tubule              | Tv-FAP35 | A2DUL4 | 6  | 306 | 8-19, 27-306                     | -      | -       | -      |
| 15 | B-tubule              | Tv-FAP40 | A2DSS2 | 6  | 377 | 1-377                            | -      | -       | -      |
| 16 | Ribbon                | Rib43a   | A2FZ95 | 2  | 383 | 1-357                            | Rib43a | Rib43a  | RIBC2  |
| 17 | B-tubule              | FAP77    | A2FTW1 | 6  | 283 | 71-283                           | FAP77  | CFAP77  | FAP77  |
| 18 | A-tubule              | FAP127   | A2FH94 | 2  | 490 | 1-490                            | FAP127 | CFAP127 | MNS1   |
| 19 | B-tubule              | Enkurin  | A2EMB8 | 6  | 241 | 1-241                            | FAP106 | A8I9E8  | ENKUR  |
| 20 | Inner Junction        | FAP20    | A2EAE1 | 12 | 194 | 1-184                            | FAP20  | CFAP20  | FAP20  |
| 21 | N-DRC                 | DRC4     | A2FWB4 | 1  | 512 | 315-493                          | DRC4   | DRC4    | DRC4   |
| 22 |                       | DRC2     | A2GIM1 | 1  | 461 | 251-339, 340-411                 | DRC2   | DRC2    | DRC2   |
| 23 |                       | DRC1     | A2DEK4 | 1  | 633 | 292-370, 522-633                 | DRC1   | DRC1    | DRC1   |
| 24 | External coiled coils | CFAP58   | A2FE28 | 1  | 870 | 480-726, 727-870                 | FAP189 | CFAP58  | FAP58  |
| 25 | Radial Spoke Base     | FAP253   | A2DGT8 | 1  | 396 | 200-270, 313-374                 | FAP253 | CFAP253 | IQUB   |
| 26 | Radial Spoke Base     | CCDC96   | A2DTI0 | 1  | 363 | 214-315, 316-361                 | FAP184 | CCDC96  | CCDC96 |
| 27 | External coiled coils | CCDC39   | A2EKX3 | 1  | 998 | 3-37, 58-299                     | FAP59  | CCDC39  | CCDC39 |
| 28 | External coiled coils | CCDC40   | A2DSS7 | 1  | 889 | 77-95, 105-311                   | FAP172 | CCDC40  | CCDC40 |
| 29 | N-DRC/radial spoke    | FAP91    | A2F6E6 | 1  | 602 | 305-660                          | FAP91  | CFAP91  | FAP91  |

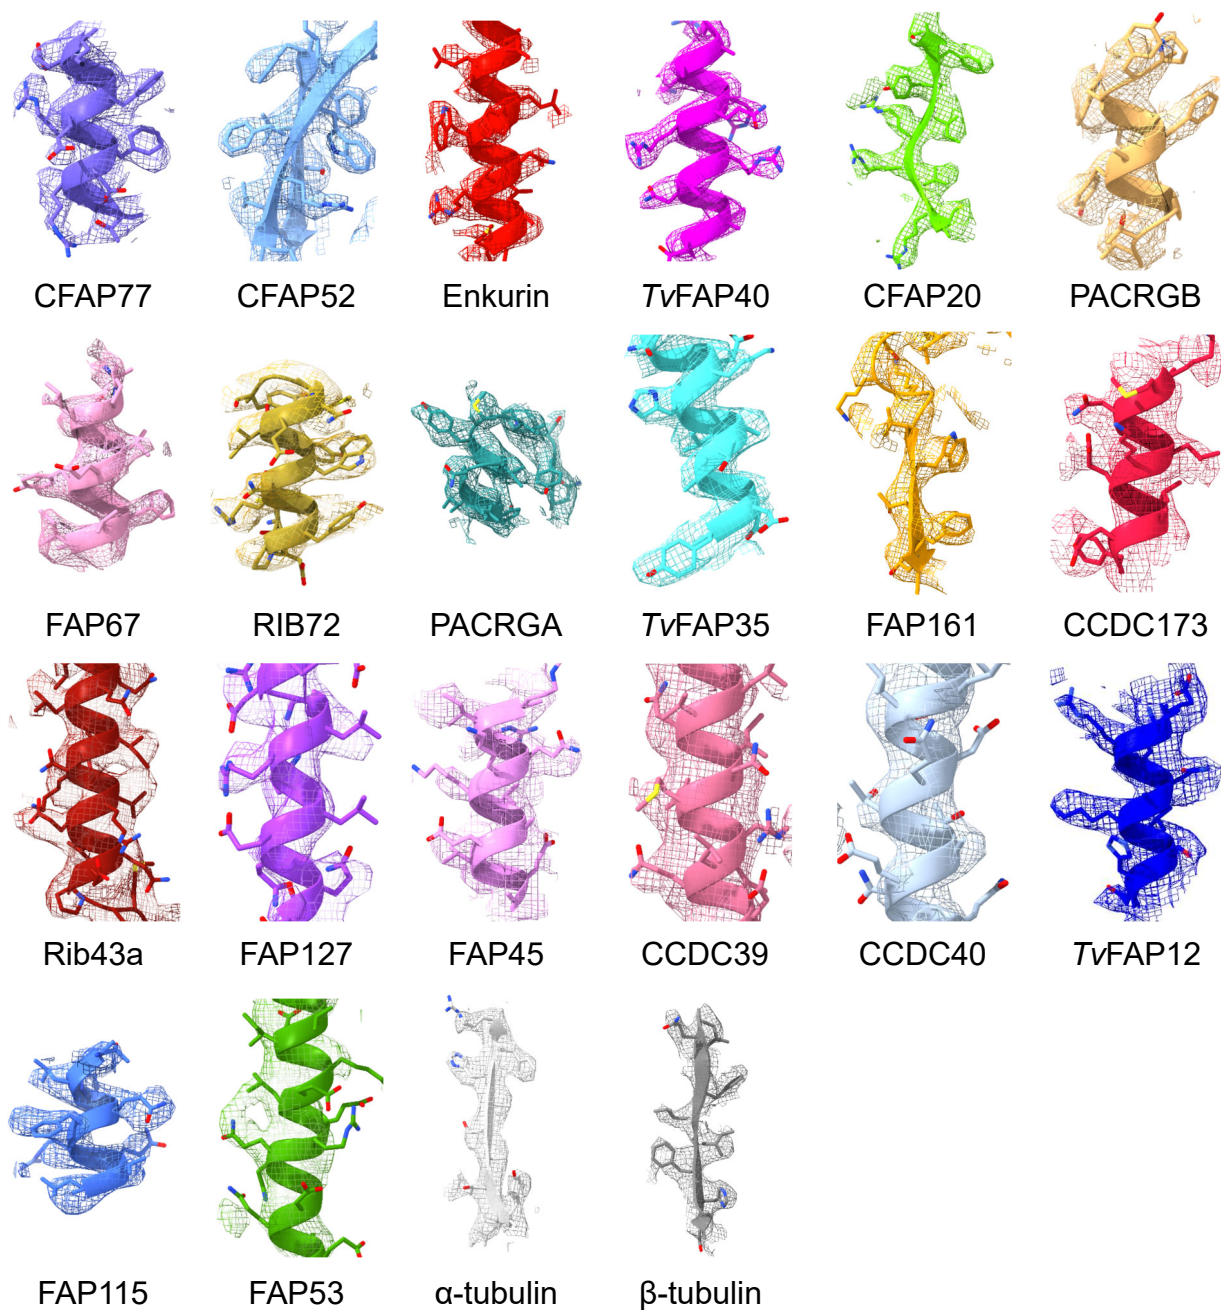

**Figure S1. Fitted models in cryo-EM densities.** Examples of cryo-EM maps with fitted atomic models of MIP and MOP proteins.

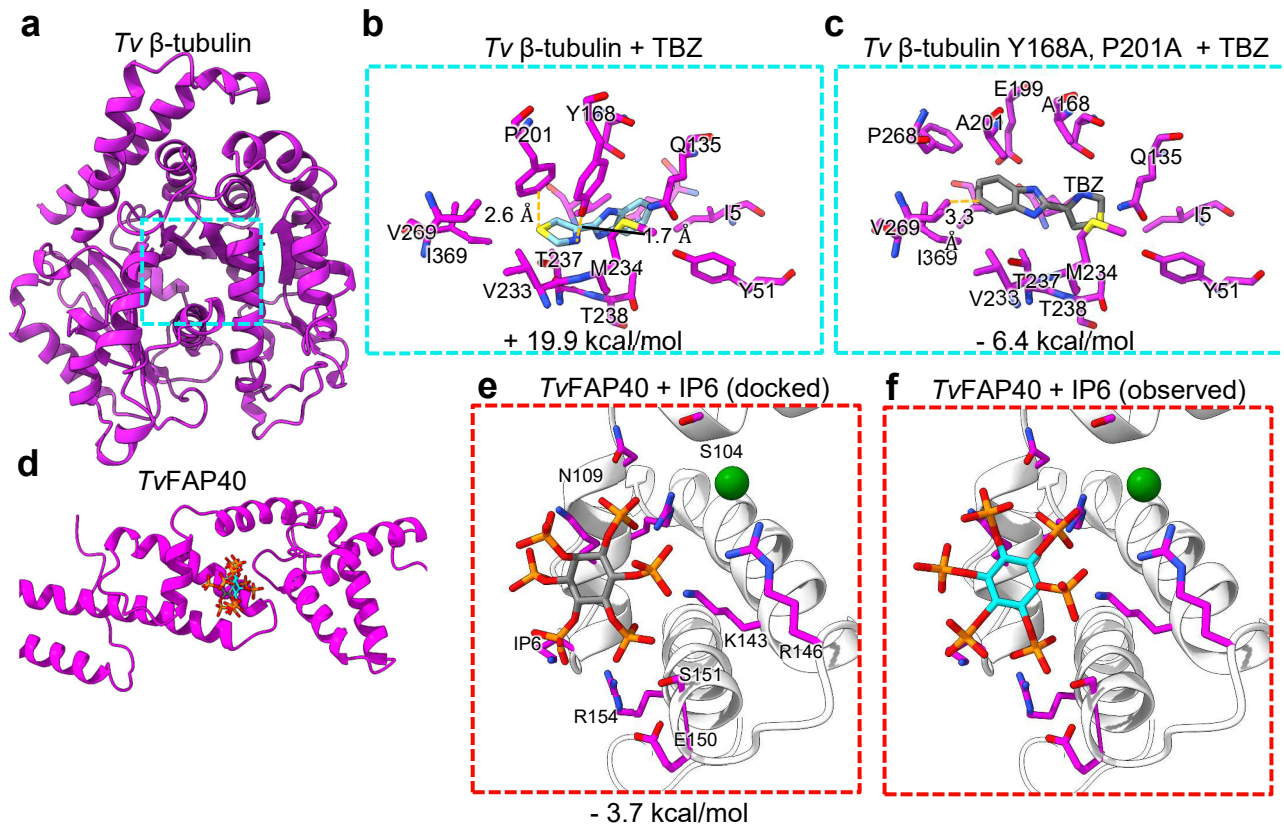

**Figure S2. Docking experiments of  $\beta$ -tubulin and *Tv*FAP40.** (a) Atomic model of  $\beta$ -tubulin with putative BZ drug binding site boxed. (b) WT *Tv*  $\beta$ -tubulin with docked thiabendazole (TBZ), fit into putative binding site. (c) *Tv*  $\beta$ -tubulin Y168A, P201A mutant with docked TBZ in putative binding site. (d) Atomic model of *Tv*FAP40 with putative IP6 binding site boxed. (e) *Tv*FAP40 binding pocket with docked IP6. (f) *Tv*FAP40 binding pocket with observed IP6.

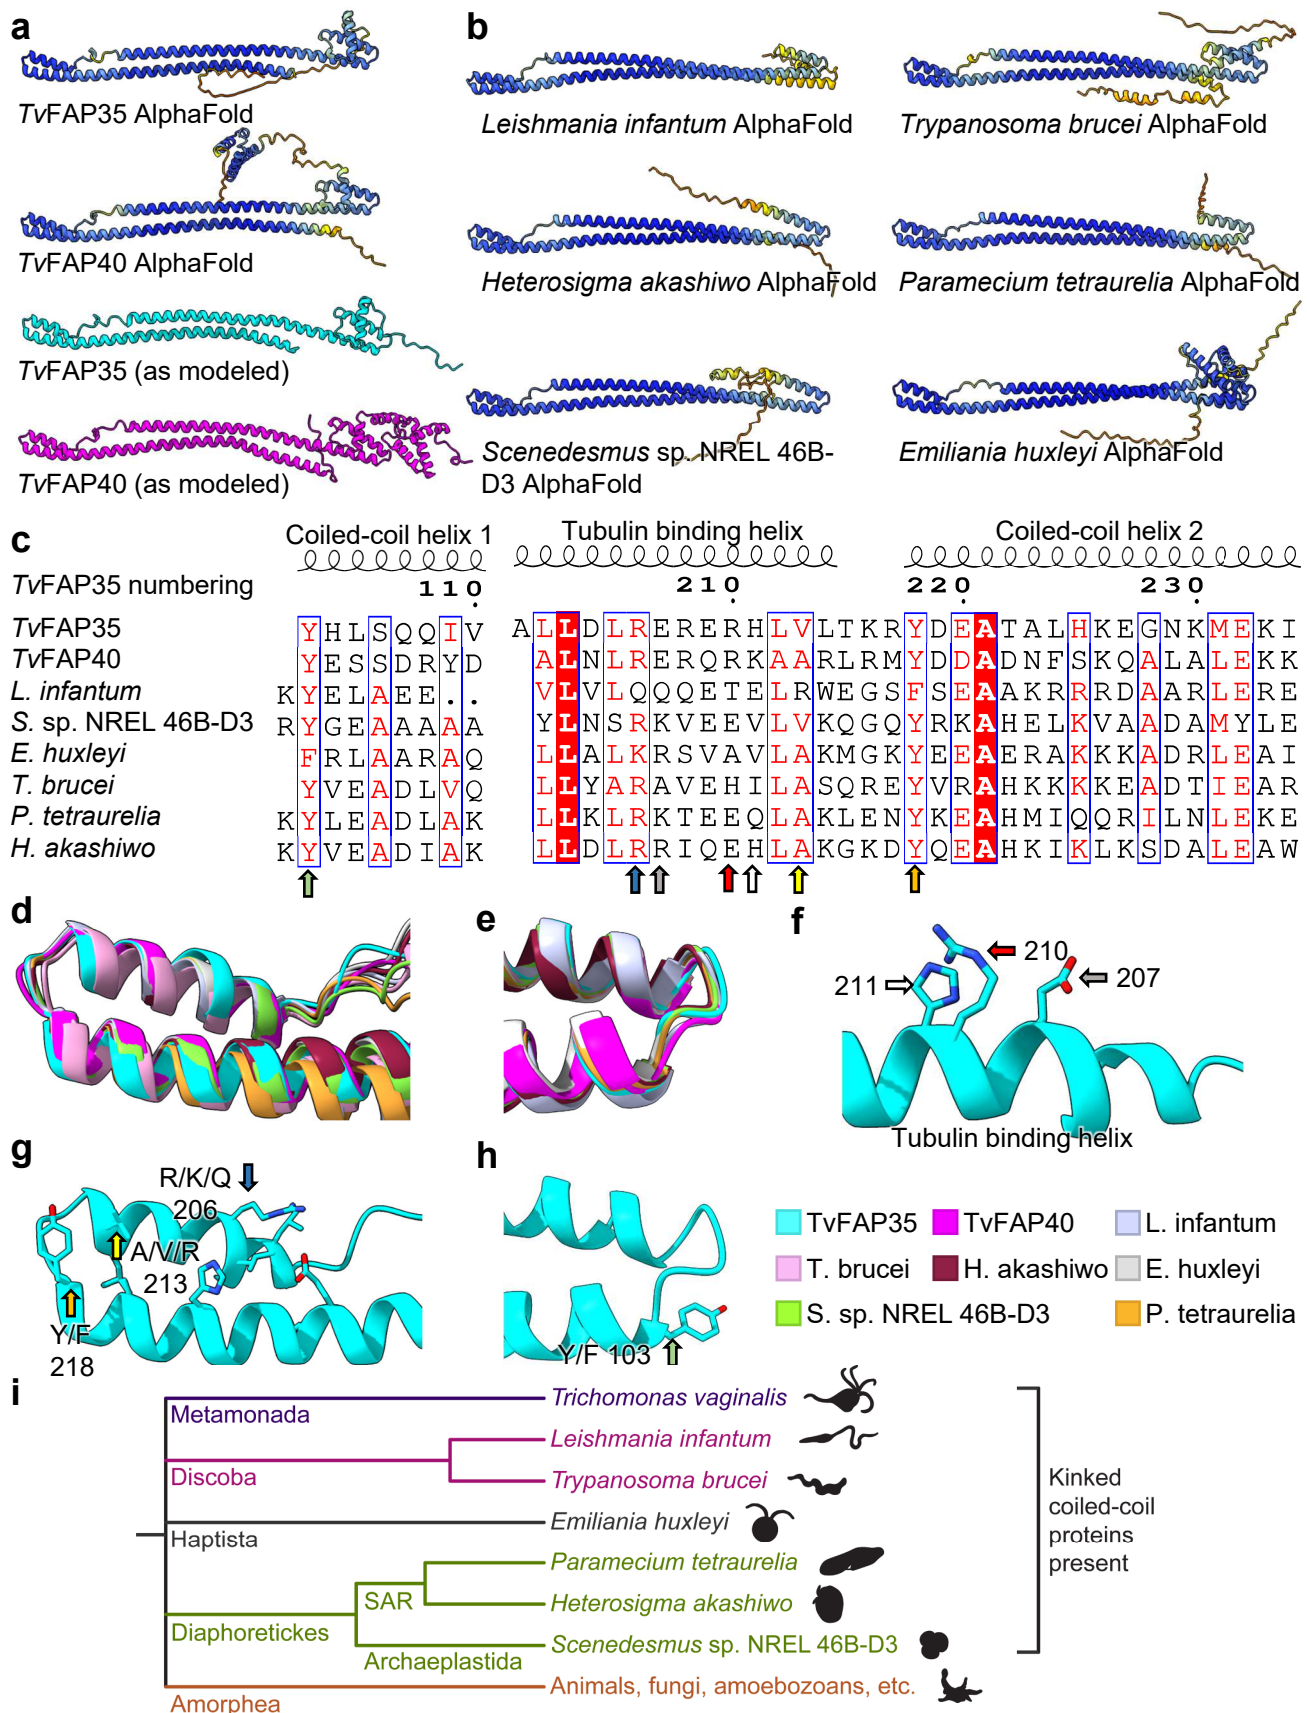

**Figure S3. Analysis of TvFAP40 and TvFAP35 and structural homologs.** (a) AlphaFold-predicted models of TvFAP35 and TvFAP40 (top) colored by AlphaFold confidence interval (blue more confident, red less confident) and their atomic models (bottom) colored in cyan and magenta respectively. (b) AlphaFold-predicted structures for structural homologs from selected species, colored by AlphaFold confidence interval. (c) Sequence alignment of dimerization and MT binding domain regions from proteins in a and b aligned to TvFAP35, with conserved residues highlighted and those at the active site indicated with arrows. (d and e)  $\alpha$ -carbon backbone aligned models from the MT-binding and dimerization domains of the kinked-coiled-coil domains. (f) Conserved proteins from c shown at their locations at the MT-binding interface on TvFAP35. (g-h) Same as f but based on both faces of the dimerization domain. (i) Phylogeny tree including organisms in which FoldSeek identified similar protein structures.

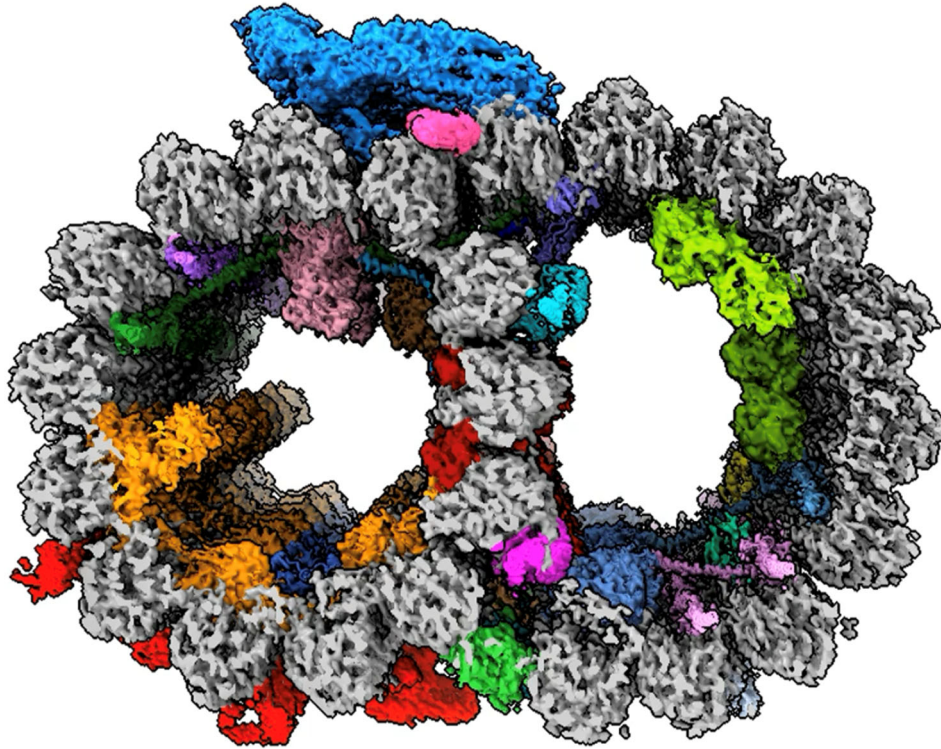

**Movie S1. overview of *Tv*-MIPs.** Cross sectional view down the *Tv*-DMT with MIP and MOP densities colored. Model view of all modeled MIPs rotated to show detail and models of *Tv*FAP35 and *Tv*FAP40 in cyan and magenta respectively.

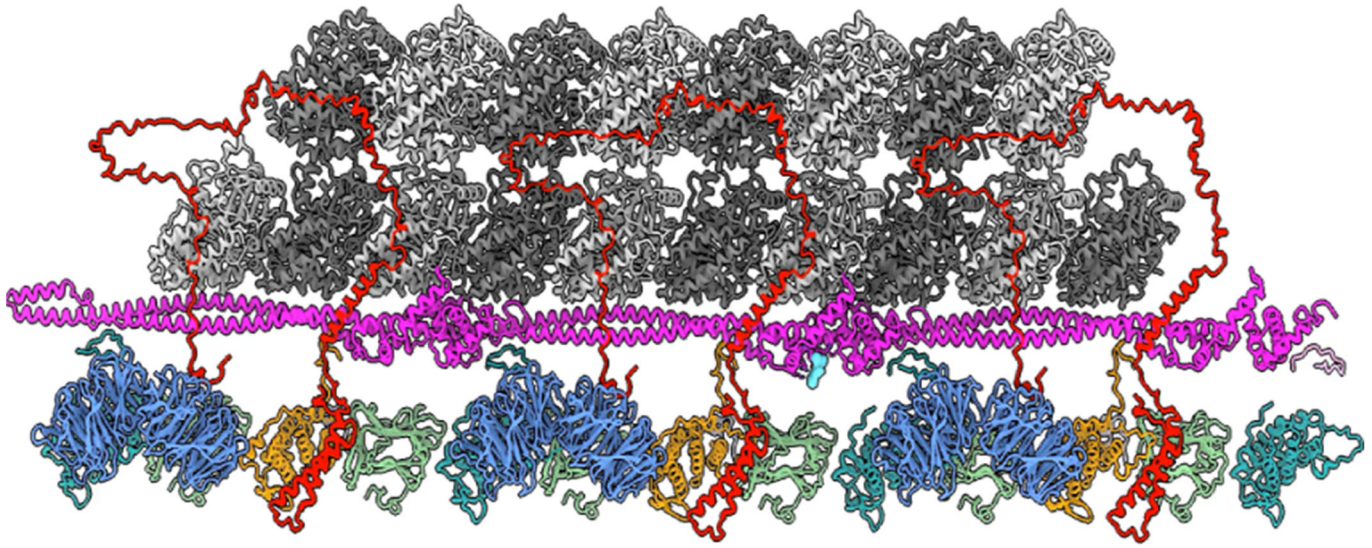

**Movie S2. *TvFAP40* ligand binding pocket.** View flying into putative ligand binding site of *TvFAP40*. Rotations around the ligand binding site with and without the cryo-EM density.
